# Supplementary material
Source: PubMed Central journal article supplement (PMC6459604)
Supplement: NIHMS1007621-supplement-Supplemental_Data.pdf [file NIHMS1007621-supplement-Supplemental_Data.pdf]

## Supplemental Data

**Table 1. Baseline Variables**

| <b>Variables</b>                              | <b>Total<br/>(n=270)</b> | <b>Low MA<br/>(&lt;35.35mm)<br/>(n=128)</b> | <b>High MA<br/>(≥35.35mm)<br/>(n=142)</b> | <b>P-<br/>value</b> |
|-----------------------------------------------|--------------------------|---------------------------------------------|-------------------------------------------|---------------------|
| Age (years)                                   | 57.1 ± 9.8               | 57.2 ± 10                                   | 57 ± 9.6                                  | 0.87                |
| Body Mass Index<br>(BMI) (kg/m <sup>2</sup> ) | 31.6 ± 6.9               | 29.8 ± 6.1                                  | 33.2 ± 7.2                                | <0.001              |
| Male Gender (%)                               | 165/270 (60%)            | 78/128 (61%)                                | 84/142 (59%)                              | 0.77                |
| African American<br>(%)                       | 66/270 (24%)             | 29/128 (22.7%)                              | 37/142 (26.1%)                            | 0.52                |
| Smoking (%)                                   | 100/270 (37%)            | 40/128 (31.3%)                              | 60/142 (42.3%)                            | 0.06                |
| Hypertension (%)                              | 250/270 (92.6%)          | 118/128 (92.2%)                             | 132/142 (93%)                             | 0.81                |
| Hyperlipidemia (%)                            | 243/270 (90%)            | 115/128 (89.8%)                             | 128/142 (90.1%)                           | 0.94                |
| Diabetes Mellitus (%)                         | 119/270 (44.1%)          | 44/128 (34.4%)                              | 75/142 (52.8%)                            | 0.002               |
| History of<br>Myocardial Infarction           | 177/270 (65.6%)          | 81/128 (63.3%)                              | 96/142 (67.6%)                            | 0.46                |

|                              |                 |                 |                 |      |
|------------------------------|-----------------|-----------------|-----------------|------|
| History of CABG              | 52/270 (19.3%)  | 27/128 (21.1%)  | 25/142 (17.6%)  | 0.47 |
| Congestive Heart Failure (%) | 42/270 (15.6%)  | 16/128 (12.5%)  | 26/142 (18.3%)  | 0.19 |
| Clinical Presentation        |                 |                 |                 |      |
| STEMI                        | 42/270 (15.6%)  | 19/128 (14.8%)  | 23/142 (16.2%)  | 0.76 |
| NSTEMI                       | 60/270 (22.2%)  | 22/128 (17.2%)  | 38/142 (26.8%)  | 0.06 |
| Unstable Angina              | 67/270 (24.8%)  | 32/128 (25%)    | 35/142 (24.6%)  | 0.95 |
| Stable CAD                   | 97/270 (35.9%)  | 51/128 (39.8%)  | 46/142 (32.4%)  | 0.2  |
| PCI vessel                   |                 |                 |                 |      |
| Left main                    | 3/270 (1.1%)    | 2/128 (1.6%)    | 1/142 (0.7%)    | 0.5  |
| LAD                          | 116/270 (43%)   | 59/128 (46.1%)  | 57/142 (40.1%)  | 0.48 |
| CX                           | 65/270 (24.1%)  | 28/128 (21.9%)  | 37/142 (26.1%)  | 0.42 |
| RCA                          | 119/270 (44.1%) | 56/128 (43.8%)  | 63/142 (44.4%)  | 0.92 |
| Number of Stents Implanted   | 1.53 ± 0.8      | 1.51 ± 0.8      | 1.54 ± 0.8      | 0.74 |
| Drug eluting stents          | 204/270 (75.6%) | 102/128 (79.7%) | 102/142 (71.8%) | 0.13 |
| Paclitaxel eluting           | 41/270 (15.2%)  | 16/128 (12.5%)  | 25/142 (17.6%)  | 0.24 |

|                              |                 |                 |                 |       |
|------------------------------|-----------------|-----------------|-----------------|-------|
| stent                        |                 |                 |                 |       |
| Sirolimus eluting stent      | 14/270 (5.2%)   | 9/128 (7%)      | 5/142 (3.5%)    | 0.19  |
| Zotarolimus eluting stent    | 9/270 (3.3%)    | 5/128 (3.9%)    | 4/142 (2.8%)    | 0.62  |
| Everolimus eluting stent     | 138/270 (51.1%) | 69/128 (53.9%)  | 69/142 (48.6%)  | 0.38  |
| Betablockers (%)             | 248/270 (91.9%) | 121/128 (94.5%) | 127/142 (89.4%) | 0.13  |
| ACE-inhibitors/ARB (%)       | 190/270 (70.4%) | 92/128 (71.9%)  | 98/142 (69%)    | 0.61  |
| Calcium Channel Blockers (%) | 39/270 (14.4%)  | 20/128 (15.6%)  | 19/142 (13.4%)  | 0.6   |
| Statins                      | 238/270 (88.1%) | 114/128 (89.1%) | 124/142 (87.3%) | 0.6   |
| Aspirin                      | 269/270 (99.6%) | 127/128 (99.3%) | 142/142 (100%)  | 0.96  |
| Clopidogrel                  | 219/270 (81.1%) | 110/128 (85.9%) | 109/142 (76.8%) | 0.054 |
| Prasugrel                    | 37/270 (13.7%)  | 13/128 (10.2%)  | 24/142 (16.9%)  | 0.11  |
| Ticagrelor                   | 8/270 (3%)      | 3/128 (2.3%)    | 5/142 (3.5%)    | 0.57  |

**Table 1.**

Baseline demographics and clinical variables for total study population, and grouped according to low and high fibrin clot strength (MA). Comparison of variables with t-test for continuous variables and chi-square for categorical variables.
